# Supplementary material for: Prevalences of Antibiotic-Resistant and Multidrug Resistant Bacteria in Urine Cultures from Inpatients with Spinal Cord Injuries and Disorders: An 8-Year, Single-Center Experience
Source: Research Square preprint supplement (doi:10.21203/rs.3.rs-1046860/v1), 2021-11-19
Supplement: Supplementary file 1 [file 31f0eac7b31c0e9fd7dc5a38.xlsx]

## Sheet: List1
Table 5	Univariate analysis of the risk of multidrug resistance
	Variable	MDR N (%)	non MDR (N %)	Adjust OR	95% CI	p-value
	Age (mean±SD)	48 ± 17	51 ± 18	0.99	0,98-0,99	0,002 *
	Sex
	Male	579 (52%)	535 (48%)	1.51	1,16-1,98	0,003 *
	Female	113 (42%)	158 (58%)	Reference
	Etiology
	Non-traumatic	104 (47%)	118 (53%)	Reference
	Traumatic	588 (51%)	575 (49%)	1.16	0,87-1,55	0.311
	Bladder management
	CIC	105 (36%)	186 (64%)	Reference
	UC/SC	559 (55%)	464 (45%)	2.13	1,63-2,79	0,000 *
	SV	28 (39%)	43 (61%)	1.15	0,68-1,97	0.599
	Severity of injury
	AIS D	145 (46%)	171 (54%)	Reference
	C1-C4, AIS A or B or C	133 (59%)	94 (41%)	1.67	1,18-2,36	0,004 *
	C5-C8, AIS A or B or C	120 (47%)	134 (53%)	1.06	0,76-1,47	0.747
	T1-S5, AIS A or B or C	293 (50%)	290 (50%)	1.19	0,91-1,57	0.211
	Time since injury
	< 1 year	467 (49,0%)	486 (51,0%)	Reference
	1 - 5 years	78 (56,5%)	60 (43,5%)	1.35	0,94-1,94	0.1
	6 - 10 years	37 (50,0%)	37 (50,0%)	1.04	0,65-1,67	0.869
	> 10 years	110 (50,0%)	110 (50,0%)	1.04	0,78-1,40	0.79
Legend	AIS – The American Spinal Injury Association Impairment scale, UC- indwelling urethral catheter, SC – suprapubic catheter, CIC – clean intermittent catheterization, SV- spontaneous voiding
