# Supplementary material for: Prevalences of Antibiotic-Resistant and Multidrug Resistant Bacteria in Urine Cultures from Inpatients with Spinal Cord Injuries and Disorders: An 8-Year, Single-Center Experience
Source: Research Square preprint supplement (doi:10.21203/rs.3.rs-1046860/v1), 2021-11-19
Supplement: Supplementary file 2 [file 72f3337880f0ca18beb38e0d.xlsx]

## Sheet: List1
Table 3	Prevalences of MDR and non-MDR strains in groups of patients
		MDR N (%)	non MDR (N %)	p-value
	Sex
	Male	579 (52%)	535 (48%)	0.187
	Female	113 (42%)	158 (58%)	0,006 *
	Etiology
	Non-traumatic	104 (47%)	118 (53%)	0.347
	Traumatic	588 (51%)	575 (49%)	0.703
	Bladder management
	UC or SC	559 (55%)	464 (45%)	0,003 *
	CIC	105 (36%)	186 (64%)	0,000 *
	SV	28 (39%)	43 (61%)	0.075
	Severity of injury
	C1-C4, AIS A or B or C	133 (59%)	94 (41%)	0,010 *
	C5-C8, AIS A or B or C	120 (47%)	134 (53%)	0.38
	T1-S5, AIS A or B or C	293 (50%)	290 (50%)	0.901
	AIS D	145 (46%)	171 (54%)	0.144
	Time since injury
	< 1 year	467 (49,0%)	486 (51,0%)	0.538
	1 - 5 years	78 (56,5%)	60 (43,5%)	0.125
	6 - 10 years	37 (50,0%)	37 (50,0%)	1
	> 10 years	110 (50,0%)	110 (50,0%)	1
	Urinary culture
	Gram-negative	692 (58%)	510 (42%)	0,000 *
	Gram-positive	0 (0%)	183 (100%)	0,000 *
Legend	AIS – The American Spinal Injury Association Impairment scale, UC- indwelling urethral catheter, SC – suprapubic catheter, CIC – clean intermittent catheterization, SV- spontaneous voiding
