# Supplementary material for: Prevalences of Antibiotic-Resistant and Multidrug Resistant Bacteria in Urine Cultures from Inpatients with Spinal Cord Injuries and Disorders: An 8-Year, Single-Center Experience
Source: Research Square preprint supplement (doi:10.21203/rs.3.rs-1046860/v1), 2021-11-19
Supplement: Supplementary file 3 [file 893bb6f70b20c2c5bc485c82.xlsx]

## Sheet: List1
Table 1	Demographic and background data of study population
	Patient characteristic		Trauma	Non-trauma	Total
			N (row %)	N (row %)	N (col %)	col %
			319 (80,6%)	77 (19,4%)	396	-
	Age	average (SD)	46 (16)	66 (12)	49 (17)	-
		median	45	67	50	-
		(min, max)	(15, 92)	(24, 89)	(15, 92)	-
	Sex	Male	259 (85,5%)	44 (14,5%)	303	0.765152
		Female	60 (64,5%)	33 (35,5%)	93	0.234848
	NLI *	C1-4	58 (84,1%)	11 (15,9%)	69	0.172932
		C5-8	76 (88,4%)	10 (11,6%)	86	0.215539
		T	128 (72,3%)	49 (27,7%)	177	0.443609
		L, S	59 (88,1%)	8 (11,9%)	67	0.16792
	AIS *	A	101 (91,8%)	9 (8,2%)	110	0.275689
		B	54 (80,6%)	13 (19,4%)	67	0.16792
		C	71 (74,7%)	24 (25,3%)	95	0.238095
		D	91 (74,0%)	32 (26,0%)	123	0.308271
		E	4 (100,0%)	0 (0,0%)	4	0.0100251
	Time since injury	< 1 year	231 (77,0%)	69 (23,0%)	300	0.702576
		1 - 5 years	43 (91,5%)	4 (8,5%)	47	0.11007
		6-10 years	19 (90,5%)	2 (9,5%)	21	0.0491803
		> 10 years	55 (93,2%)	4 (6,8%)	59	0.138173
	Bladder manag. *	UC or SC	220 (76,9%)	66 (23,1%)	286	0.716792
		CIC	115 (93,5%)	8 (6,5%)	123	0.308271
		SV	31 (77,5%)	9 (22,5%)	40	0.100251
Legend
* the total number of patients is not 396 as some patients may appear in more than one category
NLI – Neurogenic level of injury, AIS – The American Spinal Injury Association Impairment scale, UC- indwelling urethral catheter, SC – suprapubic catheter, CIC – clean intermittent catheterization, SV- spontaneous voiding
